# Supplementary material
Source: Springer Nature journal article supplement (https://www.springermedizin.de/resource/supplementary/12884_2012_607_MOESM8_ESM.pdf/9457810)
Supplement: MOESM8 [file 9457810]

**FPC1 for temporal mean**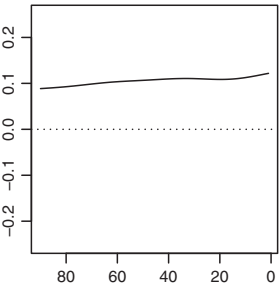**FPC2 for temporal mean**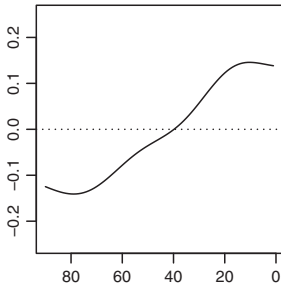**FPC3 for temporal mean**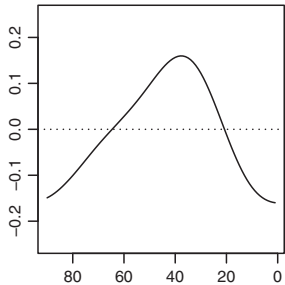**FPC1 for temporal SD**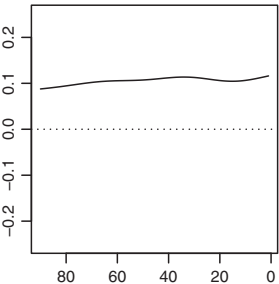**FPC2 for temporal SD**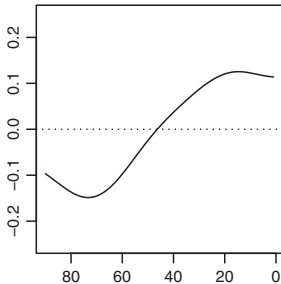**FPC3 for temporal SD**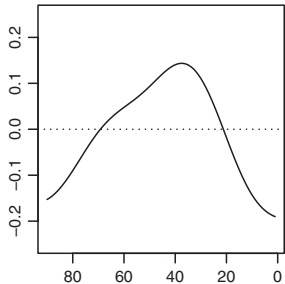

Days before birth
